# Supplementary material for: A water-tolerant C16H3PW11CrO39 catalyst for the efficient conversion of monosaccharides into 5-hydroxymethylfurfural in a micellar system
Source: Royal Society of Chemistry journal article supplement (doi:10.1039/c3ra43408g), 2013-01-01
Supplement: c3ra43408g.pdf [file c3ra43408g.pdf]

**A water-tolerant heteropolyacid  $C_{16}H_3CrPW_{11}O_{39}$  catalyst for the efficient  
conversion of monosaccharides into 5-hydroxymethylfurfural**

Hongwei Zheng<sup>a</sup>, Zhong Sun<sup>a</sup>, Xiaohu Yi<sup>a</sup>, Qian Zhao<sup>a</sup>, Chunyan Fan<sup>a</sup>, Shengtian

Wang<sup>a</sup>, Jianxin Li, Xiaohong Wang<sup>a,\*</sup>, Zijiang Jiang<sup>b,\*</sup>

<sup>a</sup> Key Lab of Polyoxometalate Science of Ministry of Education, Faculty of Chemistry,

Northeast Normal University, Changchun 130024, P. R. China. Fax:

0086-431-85099759; Tel.: 0086-431-88930042; E-mail address:

wangxh665@nenu.edu.cn

<sup>b</sup> Changchun Institute of Applied Chemistry, Chinese Academy of Sciences,

Changchun 130022, P. R. China. Tel.: 0086-431- 85262452; E-mail

address: jzj2002@sohu.com

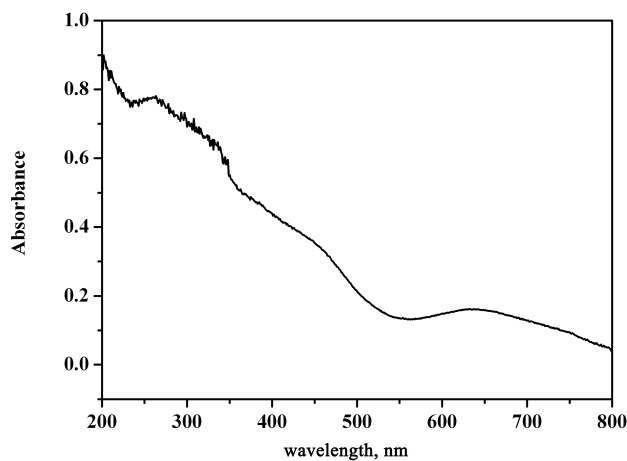

**Fig. S1** The UV-vis pattern of  $C_{16}H_3CrPW_{11}$

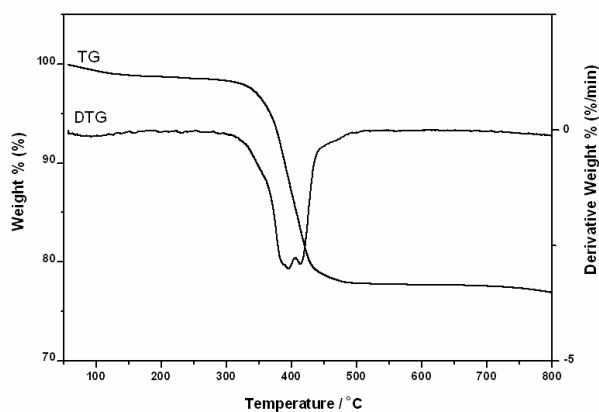

Fig. S2. TG-DTG analysis of C<sub>16</sub>H<sub>3</sub>PW<sub>11</sub>Cr

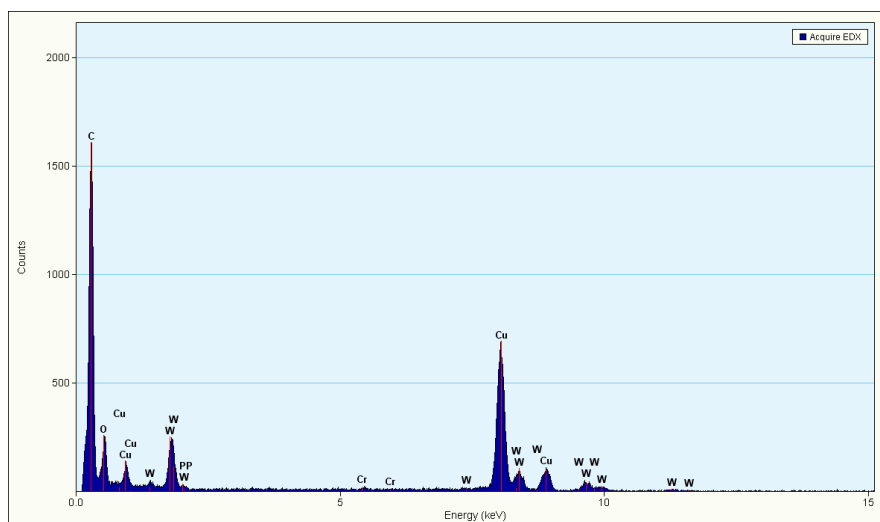

Fig. S3. EDAX spectra of C<sub>16</sub>H<sub>3</sub>PW<sub>11</sub>Cr

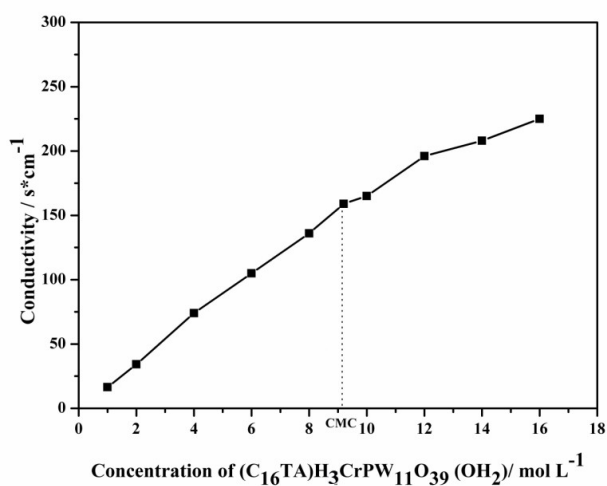

Fig. S4. The conductivity of C<sub>16</sub>H<sub>3</sub>PW<sub>11</sub>Cr at the room temperature.

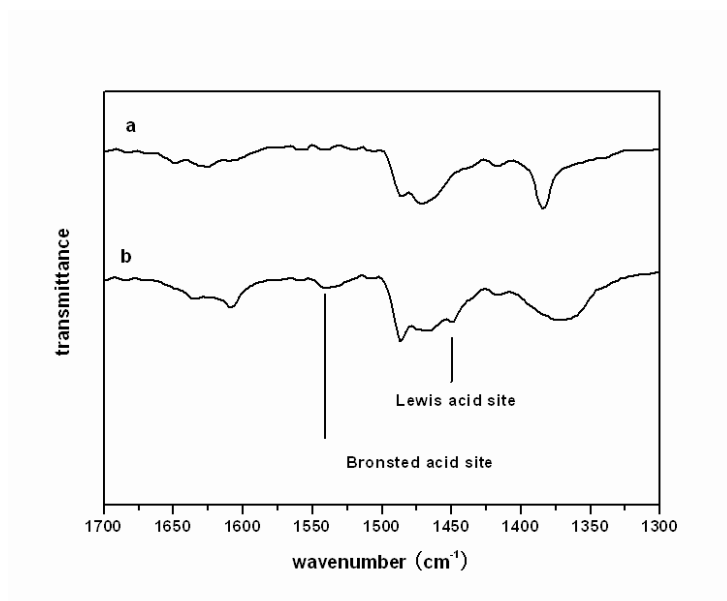

**Fig. S5.** C<sub>16</sub>H<sub>3</sub>CrPW<sub>11</sub>O<sub>39</sub> (a) and adsorbed pyridine of C<sub>16</sub>H<sub>3</sub>CrPW<sub>11</sub>O<sub>39</sub> (OH<sub>2</sub>) (b)

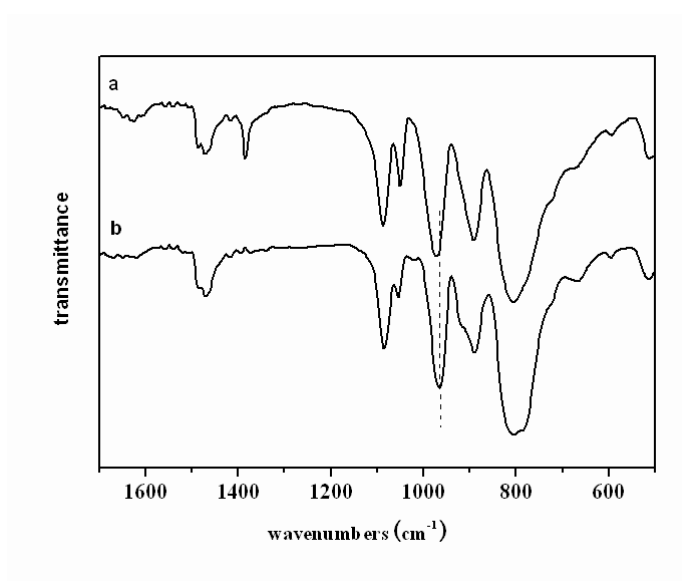

**Fig. S6** The IR spectra of C<sub>16</sub>H<sub>3</sub>CrPW<sub>11</sub> (a) and C<sub>16</sub>H<sub>3</sub>CrPW<sub>11</sub> adsorption of fructose (b).
